# Supplementary material for: Polyoxymethylene as Material for Removable Partial Dentures—A Literature Review and Illustrating Case Report
Source: J Clin Med. 2021 Apr 2;10(7):1458. doi: 10.3390/jcm10071458 (PMC8038064; doi:10.3390/jcm10071458)
Supplement: Supplementary file 1 [file jcm-10-01458-s001.pdf]

## Supplementary Materials

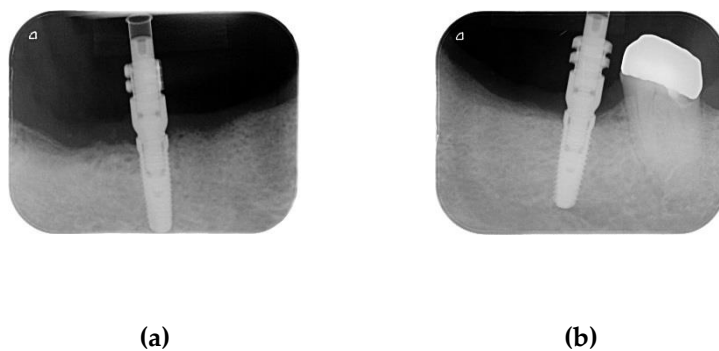

**Figure S1.** X-ray of the implants set into the lower jaw with impression posts, (a) right molar area (b) left molar area.

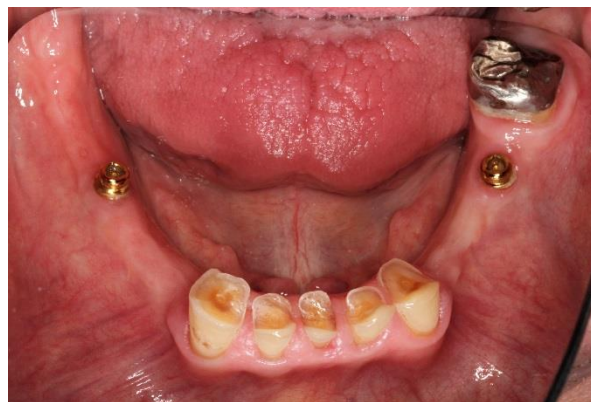

**Figure S2.** Occlusal view of the lower jaw after implant insertion and locator abutments.
